# Supplementary material for: Osteological and Biomolecular Evidence of a 7000-Year-Old Case of Hypertrophic Pulmonary Osteopathy Secondary to Tuberculosis from Neolithic Hungary
Source: PLOS journal article supplement (doi:10.1371/journal.pone.0078252), 2013-10-30
Supplement: S4 (10.1371/journal.pone.0078252.s004) [file journal.pone.0078252.s004.pdf]

## S4: Results of aDNA analysis

### 1. Gel electrophoresis of IS1081 amplicons following conventional PCR

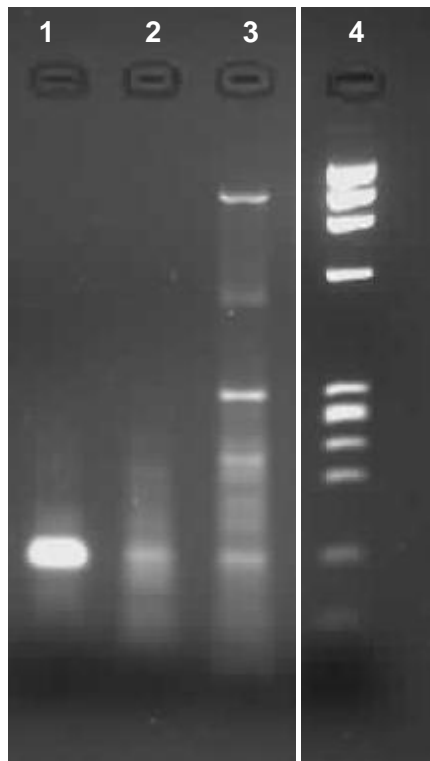

PCR amplicons using IS1081 primers (113 bp): Lane 1 sample 225 (18<sup>th</sup> century Vác, Hungary); Lane 2: HGO53 vertebra; Lane 3: HGO53 vertebra extracted with PTB; Lane 4: molecular size markers ( $\Phi$ X174 *Hae*III digest, band 2 is 118bp)

### 2. Gel electrophoresis of IS 1081 amplicons following real time PCR with SYBR Green

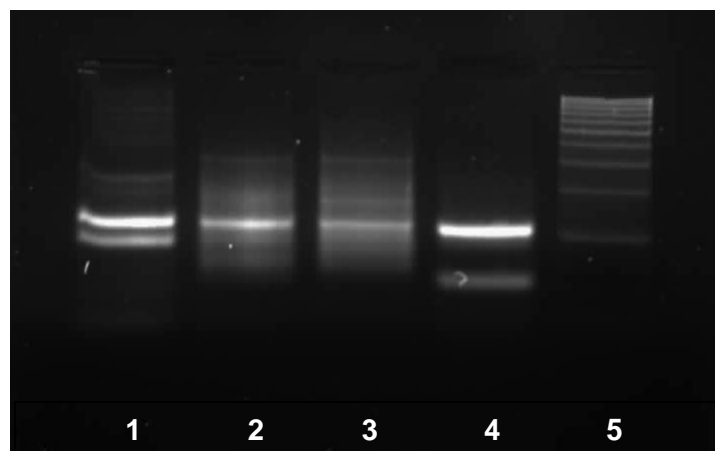

PCR amplicons using IS1081 primers (113 bp): Lane 1 sample 225 (18<sup>th</sup> century Vác, Hungary); Lane 2: HGO53 vertebra; Lane 3: HGO53 vertebra extracted with PTB; Lane 4: sample 50 (Zalavár-Vársziget, Hungary); Lane 5: molecular size markers (20bp and 100bp ladders)

### 3. Melt analysis following IS1081 PCR to determine $T_m$ of amplicon

#### Profile

| Cycle                                                                                | Cycle Point                                              |
|--------------------------------------------------------------------------------------|----------------------------------------------------------|
| Hold @ 95°C, 15 min 0 secs                                                           |                                                          |
| Cycling (45 repeats)                                                                 | Step 1 @ 95°C, hold 10 secs                              |
|                                                                                      | Step 2 @ 60°C, hold 30 secs                              |
|                                                                                      | Step 3 @ 72°C, hold 16 secs                              |
|                                                                                      | Step 4 @ 85°C, hold 15 secs, acquiring to Cycling A(FAM) |
| Melt (76-98°C), hold 30 secs on the 1st step, hold 5 secs on next steps, Melt A(FAM) |                                                          |

#### Melt data for Melt A.FAM

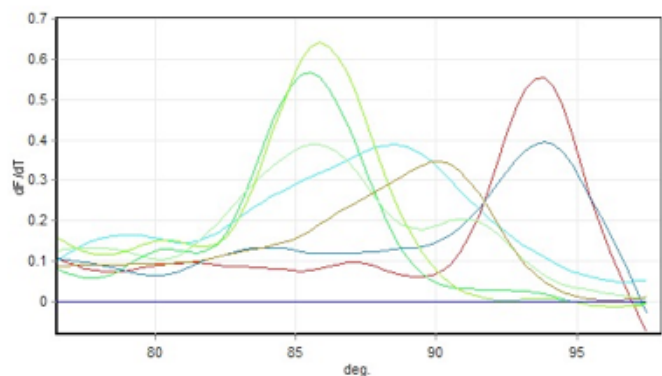

| No. | Colour       | Name  | Genotype | Peak1 | Peak2 | Peak3 |
|-----|--------------|-------|----------|-------|-------|-------|
| 1   | Red          | 225R+ |          | 81.3  | 87    | 93.7  |
| 2   | Cyan         | V     |          | 79    | 88.5  |       |
| 3   | Green        | oEC   |          | 80.5  | 85.5  |       |
| 4   | Blue         | V+    |          | 84    | 93.8  |       |
| 5   | Light Green  | oEC+  |          | 77.7  | 85.7  | 91    |
| 13  | Yellow-Green | EC    |          | 80.5  | 85.8  | 93.8  |
| 21  | Brown        | PCRC  |          | 90    |       |       |

- No. 1 – sample 225 (18<sup>th</sup> century Vác, Hungary)
  - No. 2 – sample HGO-53 (vertebra) extracted without PTB
  - No. 3 – original negative extraction control extracted without PTB
  - No. 4 – sample HGO-53 (vertebra) extracted with PTB
  - No. 5 – original extraction control extracted with PTB
  - No.13– extraction control for later batch without PTB
  - No.21– water blank reaction negative control
- [Other channels used for later batch of different samples so are not shown]

The  $T_m$  of the positive control (No. 1) is 93.7 °C and for the HGO-53 vertebra (No. 4) is 93.8 °C. This is an acceptable match but requires DNA sequencing for confirmation.

The sequencing did not give acceptable data so lipid molecular markers were sought in order to confirm the provisional identification of *Mycobacterium tuberculosis* complex DNA.
